# Supplementary material
Source: Royal Society of Chemistry journal article supplement (doi:10.1039/d5en01175b)
Supplement: d5en01175b1.pdf [file d5en01175b1.pdf]

## Supplementary material

**Table S1 Physical and chemical properties of CuO-NPs and CuO-SMPs**

**Table S2 Component of SE medium**

**Text S1 Calculation formula of microalgae growth inhibition rate**

**Figure S1 The effects of (a) CuO-NPs and (b) CuO-SMPs on the cell size and granularity of *Chlamydomonas reinhardtii*.**

**Figure S2 The contour offset plot of cell membrane integrity of *Chlamydomonas reinhardtii* under stress of CuO-NPs and CuO-SMPs**

**Figure S3 The heat map of 77 differential genes associated with oxidoreductase activity**

**Figure S4 Photosynthesis pathway**

**Figure S5 Photosynthesis-antenna protein pathway**

**Figure S6 Peroxisome pathway**

**Figure S7 Ascorbate pathway**

**Figure S8 Glutathione metabolism pathway**

**Figure S9 ABC transporters pathway**

**Table S1 Physical and chemical properties of CuO-NPs and CuO-SMPs**

| <b>Property</b>                              | <b>CuO-NPs</b> | <b>CuO-SMPs</b> |
|----------------------------------------------|----------------|-----------------|
| Diameter (nm)                                | 40             | 150-250         |
| Purity (%)                                   | 99.5           | 99.0%           |
| Specific surface area (m <sup>2</sup> /g)    | 29.17          | 14.75           |
| Zeta potential (Mv)                          | -13.9 ± 1.41   | -7.5 ± 0.63     |
| Hydraulic particle size in algal liquor (nm) | 633.5 ± 72     | 814.3 ± 93      |

**Table S2 Component of SE medium**

| #  | Component                                | Dosage (mL/L) | Parent Solution (g/L dH <sub>2</sub> O) |
|----|------------------------------------------|---------------|-----------------------------------------|
| 1  | NaNO <sub>3</sub>                        | 1.00          | 2.50                                    |
| 2  | K <sub>2</sub> HPO <sub>4</sub>          | 1.00          | 0.75                                    |
| 3  | MgSO <sub>4</sub> ·7H <sub>2</sub> O     | 1.00          | 0.75                                    |
| 4  | CaCl <sub>2</sub> ·2H <sub>2</sub> O     | 1.00          | 0.25                                    |
| 5  | KH <sub>2</sub> PO <sub>4</sub>          | 1.00          | 1.75                                    |
| 6  | NaCl                                     | 1.00          | 0.25                                    |
| 7  | FeCl <sub>3</sub> ·6H <sub>2</sub> O     | 1.00          | 0.05                                    |
| 8  | EDTA-Fe*                                 | 1.00          |                                         |
| 9  | A <sub>5</sub> (Trace mental solution)** | 1.00          |                                         |
| 10 | Soil extract***                          | 40.00         |                                         |

\*EDTA-Fe

1N HCl: 4.1 mL HCl was diluted to 50 mL with distilled water

0.1N EDTA-Na<sub>2</sub>: 0.9306 g EDTA-Na<sub>2</sub> was dissolved in 50 mL distilled water

EDTA-Fe: 0.901 g FeCl<sub>3</sub>·6H<sub>2</sub>O was dissolved in 10 mL of 1 N HCl, then mixed with 10 mL of 0.1 N EDTA-Na<sub>2</sub> and diluted to 1000 mL with distilled water

\*\*A<sub>5</sub> (Trace mental solution)

| # | Component                                             | Concentration (g/L dH <sub>2</sub> O) |
|---|-------------------------------------------------------|---------------------------------------|
| 1 | H <sub>3</sub> BO <sub>3</sub>                        | 2.86                                  |
| 2 | MnCl <sub>2</sub> ·4H <sub>2</sub> O                  | 1.86                                  |
| 3 | ZnSO <sub>4</sub> ·7H <sub>2</sub> O                  | 0.22                                  |
| 4 | Na <sub>2</sub> MoO <sub>4</sub> ·2H <sub>2</sub> O   | 0.39                                  |
| 5 | CuSO <sub>4</sub> ·5H <sub>2</sub> O                  | 0.08                                  |
| 6 | Co(NO <sub>3</sub> ) <sub>2</sub> ·6 H <sub>2</sub> O | 0.05                                  |

\*\*\*Soil extract

200 g unfertilized soil was added to 1000 mL of distilled water, water bath at 100 for 3 h, cooled, and precipitated for 24 h. This process was carried out 3 times in a row, then filtered, and the supernatant was taken, sterilized (121 °C, 30 min) and stored in a refrigerator at 4 °C

### **Text S1 Calculation formula of microalgae growth inhibition rate**

The growth inhibition rate (BIR) of *C. reinhardtii* was calculated by the following formula:

$$\text{BIR (\%)} = (1 - N/N_0) \times 100\%$$
, where N was the cell density (cells/mL) in the CuO-NPs and CuO-MPs experimental group, and  $N_0$  was the cell density (cells/mL) in the control group.

**Figure S1** The effects of (a) CuO-NPs and (b) CuO-SMPs on the cell size and granularity of *Chlamydomonas reinhardtii*.

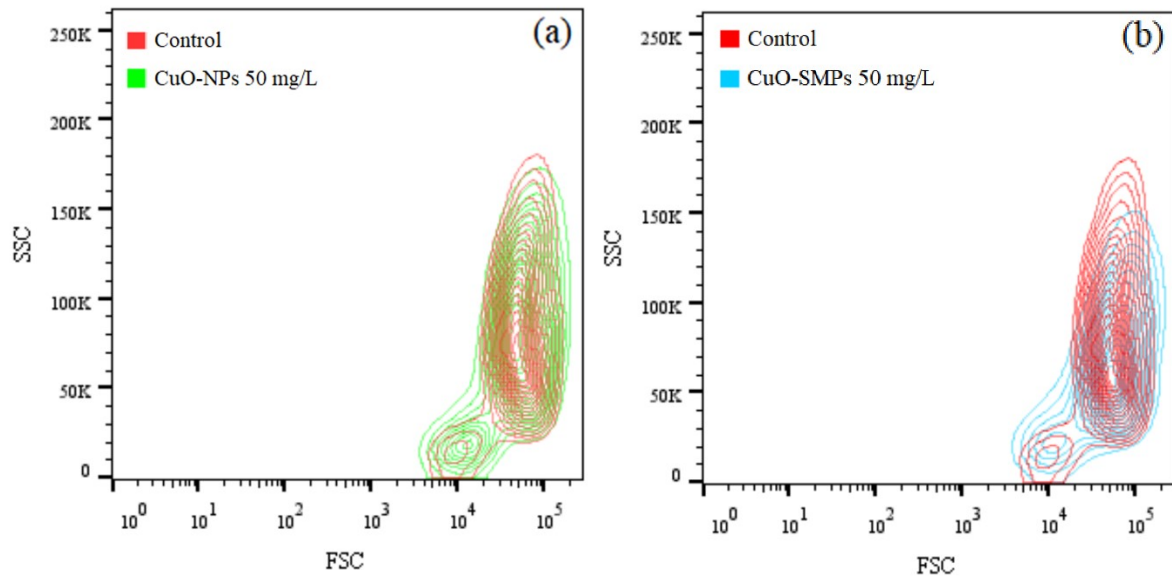

**Fig.S1** The effects of (a) CuO-NPs and (b) CuO-SMPs on the cell size and granularity of *Chlamydomonas reinhardtii*.

**Figure S2** The contour offset plot of cell membrane integrity of *Chlamydomonas reinhardtii* under stress of CuO-NPs and CuO-SMPs

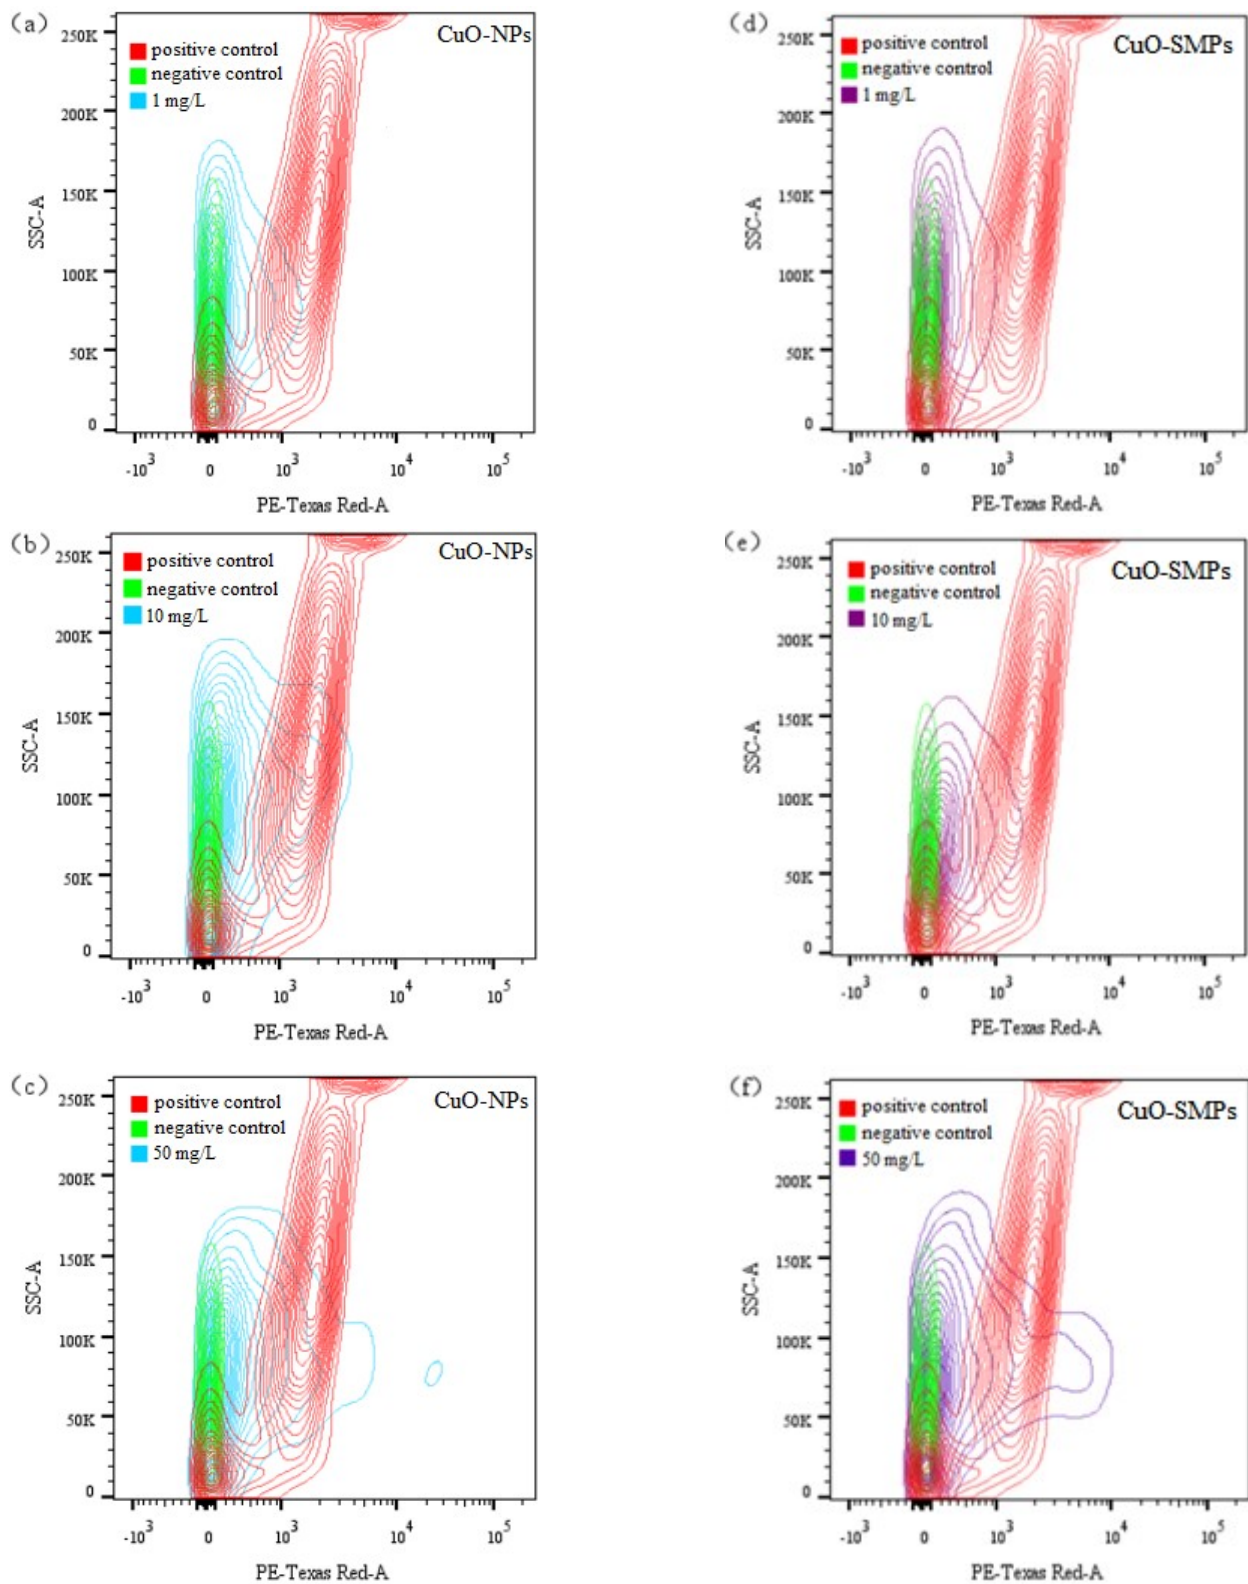

**Fig. S2.** The contour offset plot of cell membrane integrity of *Chlamydomonas reinhardtii* under stress of CuO-NPs and CuO-SMPs. CuO-NPs (a-c), CuO-SMPs(d-f).

**Figure S3 The heat map of 77 differential genes associated with oxidoreductase activity**

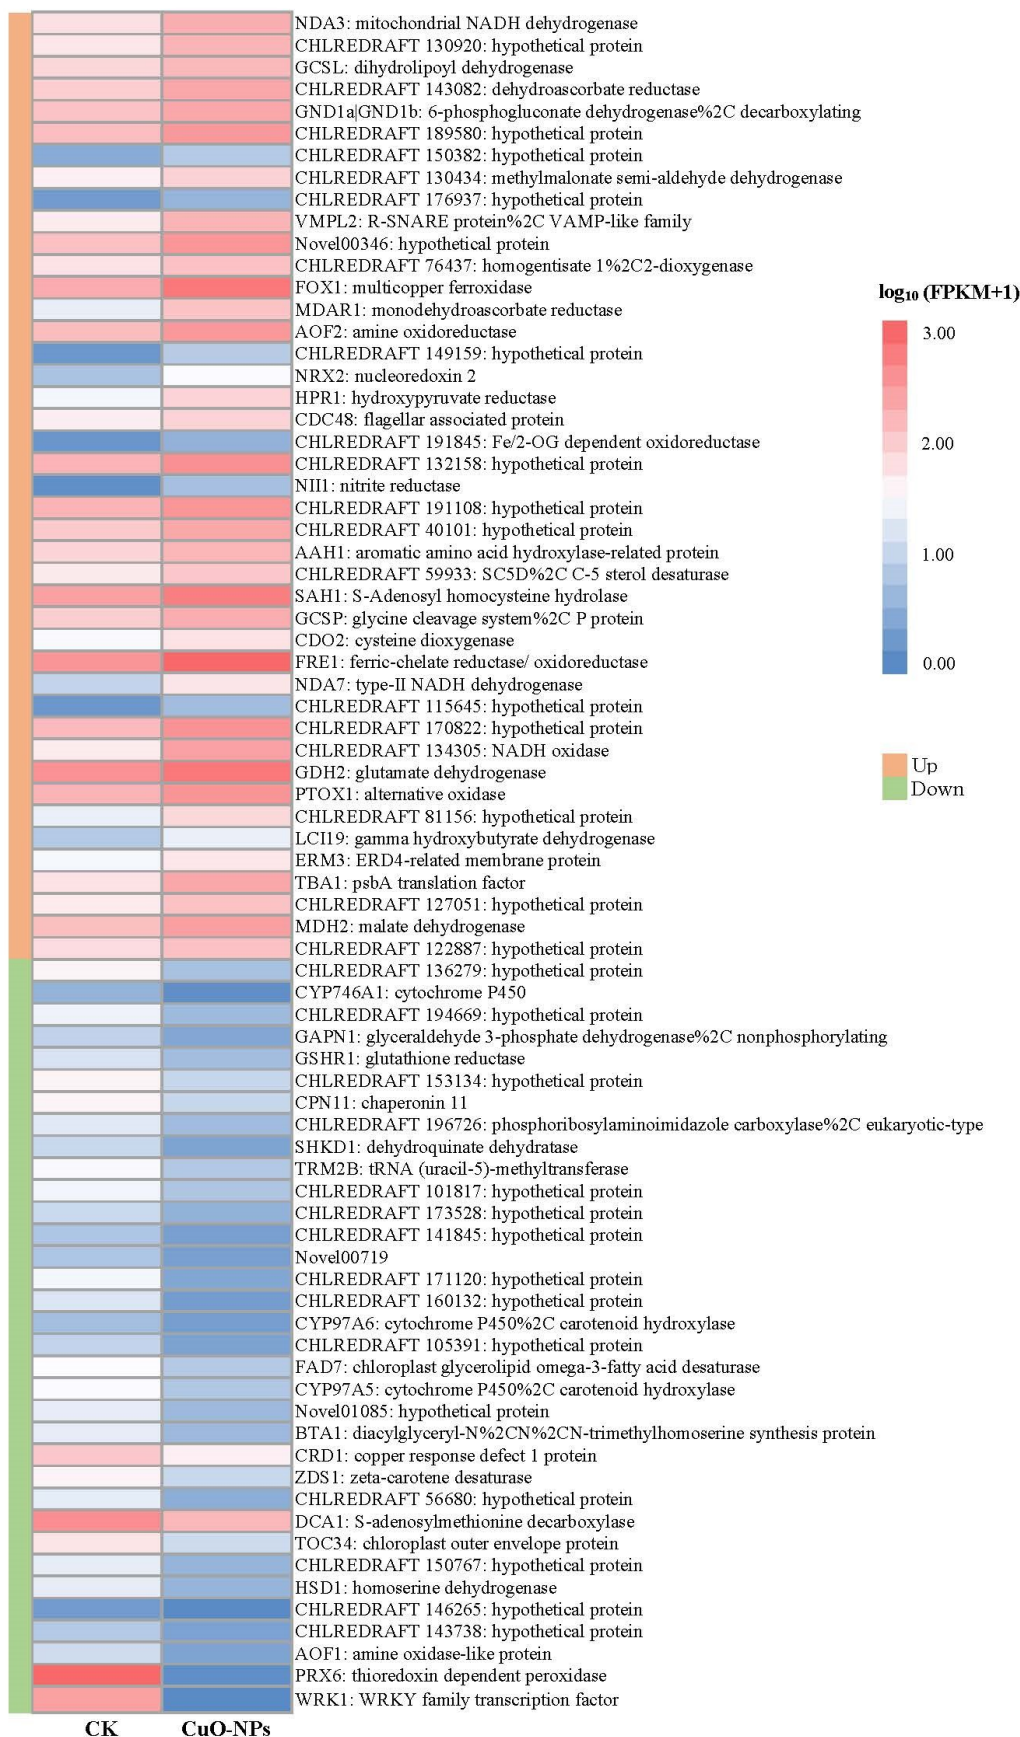

**Fig. S3. The heat map of 77 differential genes associated with oxidoreductase activity**



**Figure S5 Photosynthesis-antenna protein pathway**

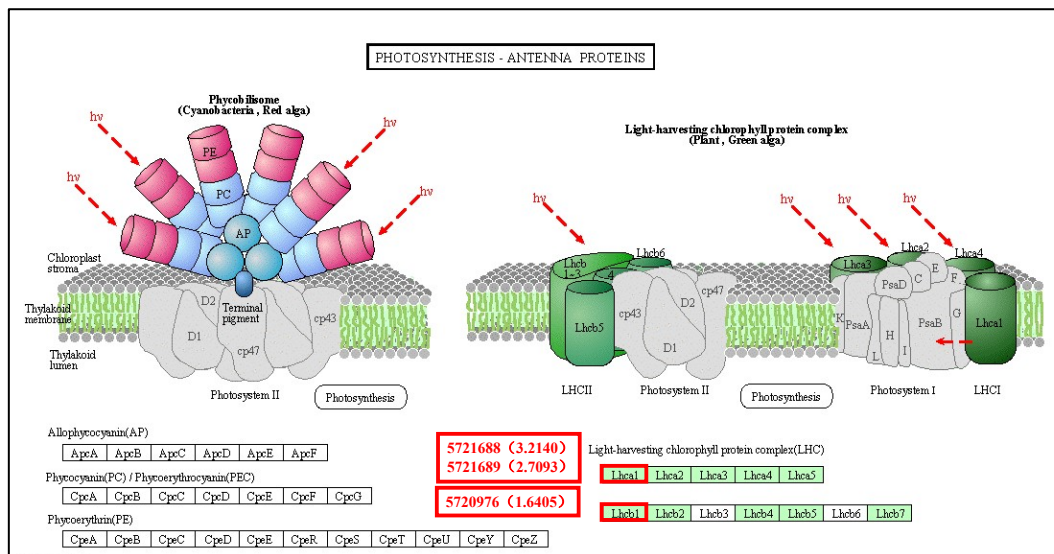

**Fig. S5. Photosynthesis-antenna protein pathway. Red represents the up-regulated gene, green represents the down-regulated gene, yellow represents both up-regulated and down-regulated genes,  $\log_2$  (Fold change) in parentheses.**

**Figure S6 Peroxisome pathway**

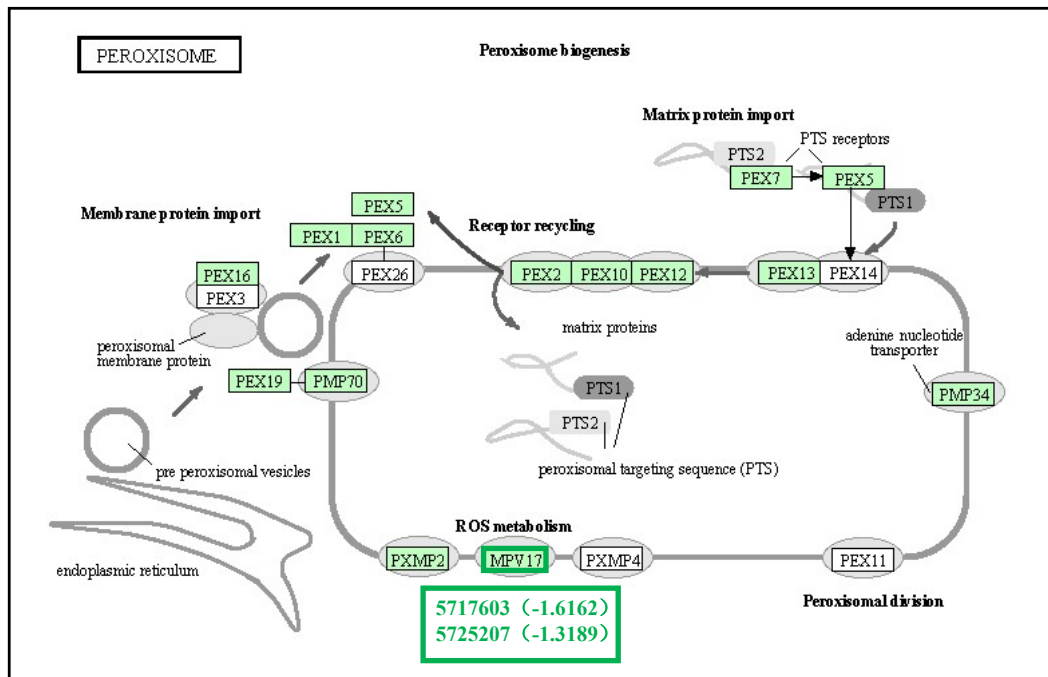

**Fig. S6. Peroxisome pathway. Red represents the up-regulated gene, green represents the down-regulated gene, yellow represents both up-regulated and down-regulated genes,  $\log_2$  (Fold change) in parentheses.**

**Figure S7 Ascorbate pathway**

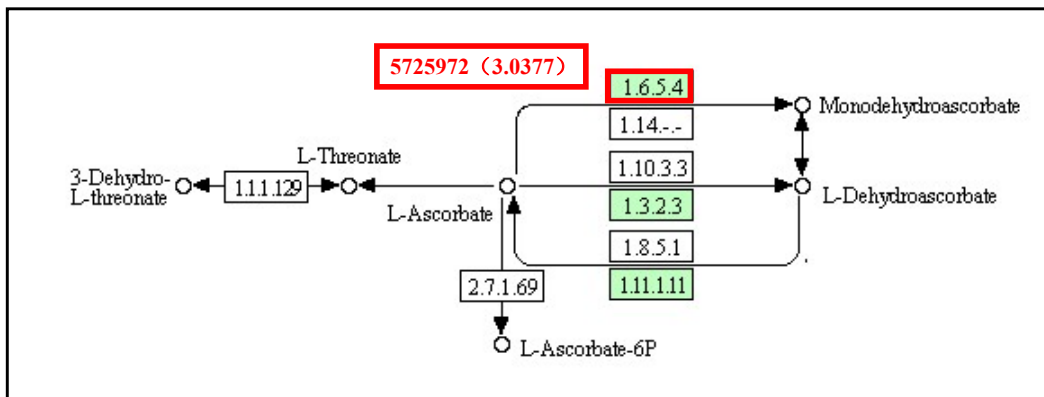

**Fig. S7. Ascorbate pathway. Red represents the up-regulated gene, green represents the down-regulated gene, yellow represents both up-regulated and down-regulated genes,  $\log_2$  (Fold change) in parentheses.**

**Figure S8 Glutathione metabolism pathway**

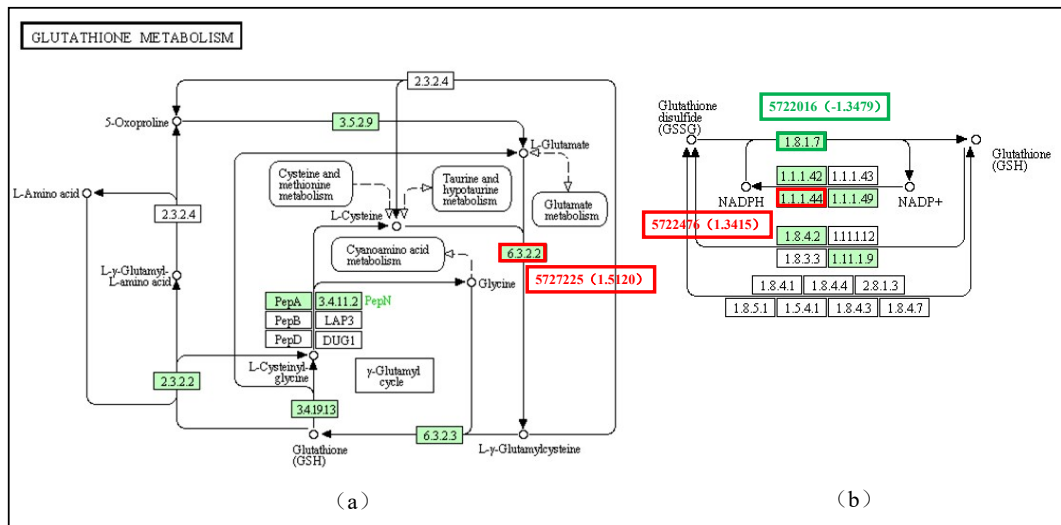

**Fig. S8. Glutathione metabolism pathway. synthesis of GSH(a), redox process of GSH and GSSG (b). Red represents the up-regulated gene, green represents the down-regulated gene, yellow represents both up-regulated and down-regulated genes, log<sub>2</sub> (Fold change) in parentheses.**

**Fig. S9 ABC transporters pathway**

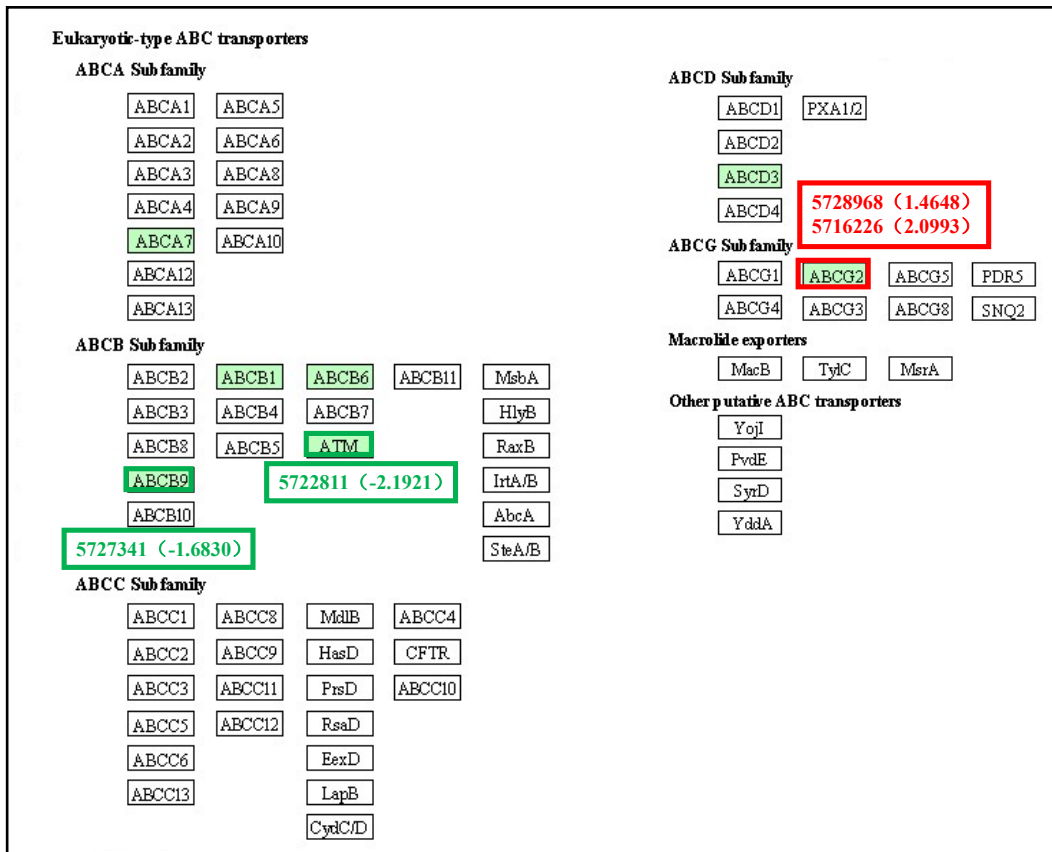

**Fig. S9. ABC transporters pathway. Red represents the up-regulated gene, green represents the down-regulated gene, yellow represents both up-regulated and down-regulated genes, log<sub>2</sub> (Fold change) in parentheses.**
